# Supplementary material for: Regulating the electronic properties of MoSe2 to improve its CO2 electrocatalytic reduction performance via atomic doping
Source: Royal Society of Chemistry journal article supplement (doi:10.1039/d0nj05993e), 2021-01-01
Supplement: d0nj05993e1.pdf [file d0nj05993e1.pdf]

## **Electronic Supplementary Information**

### **Regulating the electronic properties of MoSe<sub>2</sub> to improve its CO<sub>2</sub> electrocatalytic reduction performance via atomic doping**

Jingjing Ye<sup>a</sup>, Dewei Rao<sup>\*ab</sup>, and Xiaohong Yan<sup>\*a</sup>

<sup>a</sup> School of Materials Science and Engineering, Jiangsu University, Zhenjiang 212013, P. R. China.

Fax: +86-511-88783268

Email: dewei@ujs.edu.cn; yanxh@ujs.edu.cn

<sup>b</sup> Department of Chemistry and Biochemistry, University of California, 1156 High Street, Santa Cruz, CA 95064, United States.

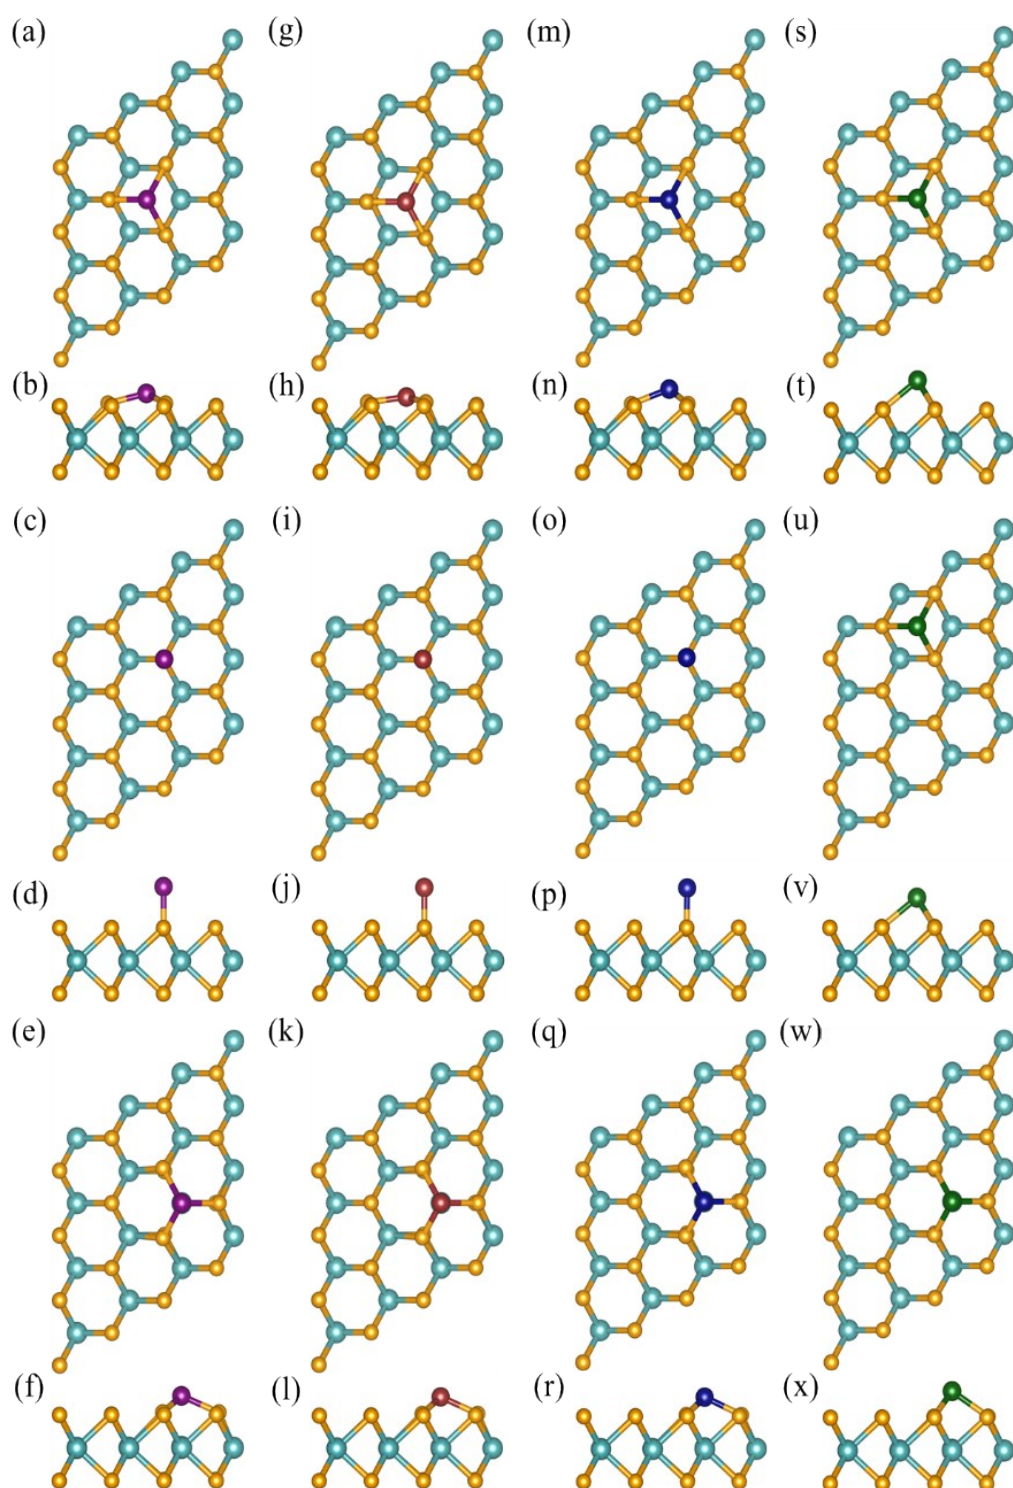

**Fig. S1** Top and side views of the optimized structures of (a-b)  $\text{Fe}_\text{H}@\text{MoSe}_2$ , (c-d)  $\text{Fe}_\text{ST}@\text{MoSe}_2$ , (e-f)  $\text{Fe}_\text{MT}@\text{MoSe}_2$ , (g-h)  $\text{Co}_\text{H}@\text{MoSe}_2$ , (i-j)  $\text{Co}_\text{ST}@\text{MoSe}_2$ , (k-l)  $\text{Co}_\text{MT}@\text{MoSe}_2$ , (m-n)  $\text{Ni}_\text{H}@\text{MoSe}_2$ , (o-p)  $\text{Ni}_\text{ST}@\text{MoSe}_2$ , (q-r)  $\text{Ni}_\text{MT}@\text{MoSe}_2$ , (s-t)  $\text{Cu}_\text{H}@\text{MoSe}_2$ , (u-v)  $\text{Cu}_\text{ST}@\text{MoSe}_2$  and (w-x)  $\text{Cu}_\text{MT}@\text{MoSe}_2$  catalyst. The orange, blue, purple, brown, dark blue and green balls represent Se, Mo, Fe, Co, Ni and Cu atoms, respectively.

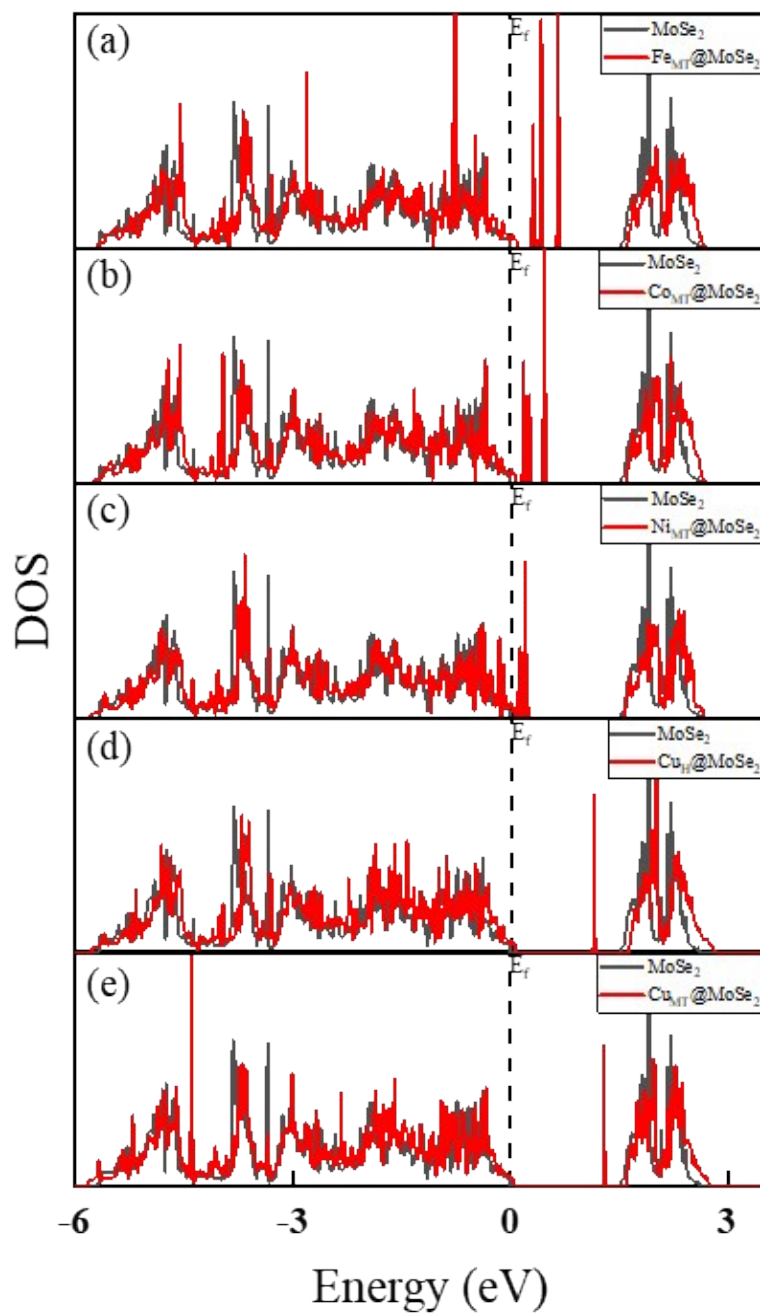

**Fig. S2** Density of states (DOS) of (a)  $\text{Fe}_{\text{MT}}@/\text{MoSe}_2$ , (b)  $\text{Co}_{\text{MT}}@/\text{MoSe}_2$ , (c)  $\text{Ni}_{\text{MT}}@/\text{MoSe}_2$  (d)  $\text{Cu}_{\text{H}}@/\text{MoSe}_2$  and (e)  $\text{Cu}_{\text{MT}}@/\text{MoSe}_2$ . The dotted line denotes the Fermi level, the red and grey lines represent the density of states of TM@MoSe<sub>2</sub> and MoSe<sub>2</sub>, respectively.

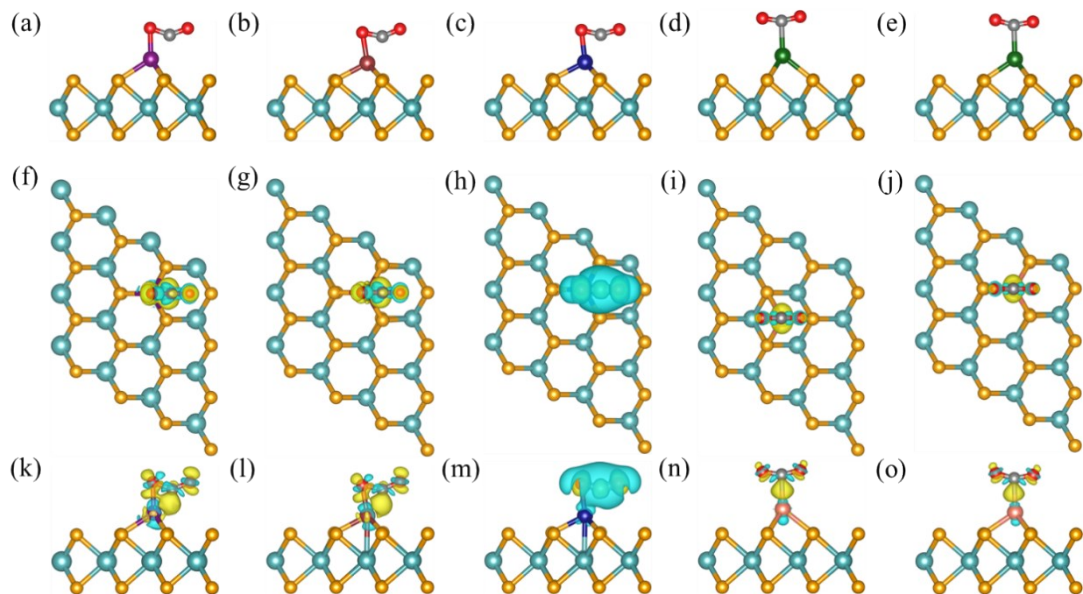

**Fig. S3** Optimized structure of CO<sub>2</sub> adsorbed on (a) Fe<sub>MT</sub>@MoSe<sub>2</sub>, (b) Co<sub>MT</sub>@MoSe<sub>2</sub>, (c) Ni<sub>MT</sub>@MoSe<sub>2</sub> (d) Cu<sub>H</sub>@MoSe<sub>2</sub> and (e) Cu<sub>MT</sub>@MoSe<sub>2</sub>. (f-j) the top and (k-o) side views of isosurface of charge density difference of TM@MoSe<sub>2</sub>. The yellow areas represent charge accumulation and the blue areas represent charge depletion. The value of isosurface is 0.0045 eV/Å<sup>3</sup>. The orange, blue, purple, brown, dark blue, green, grey and red balls represent Se, Mo, Fe, Co, Ni, Cu, C and O atoms, respectively.

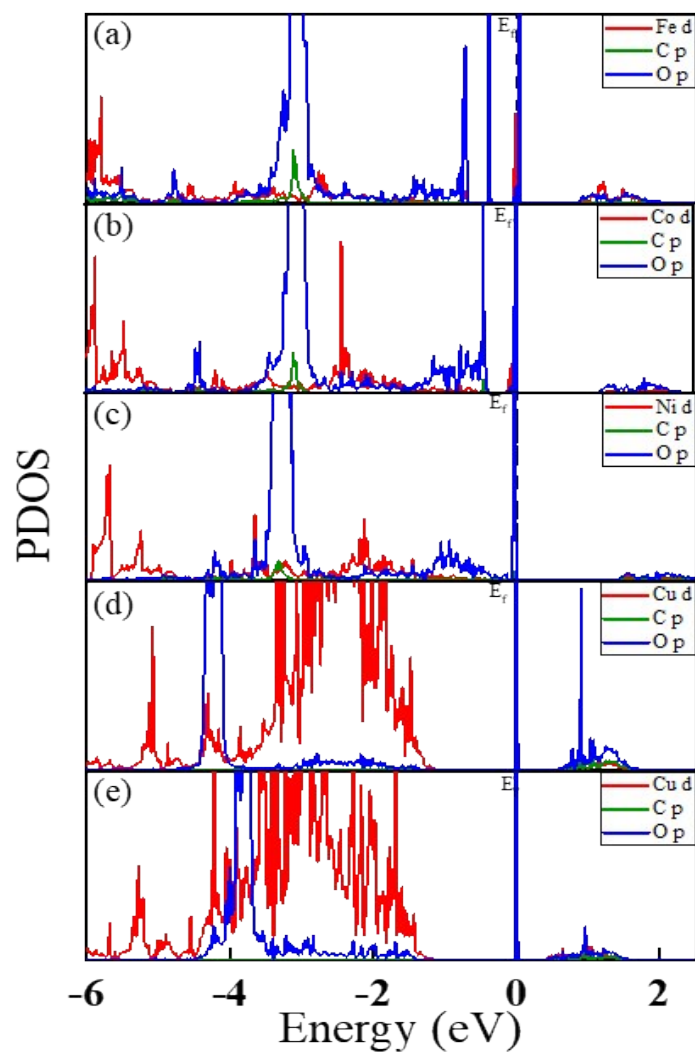

**Fig. S4** Partial density of states (PDOS) of  $\text{CO}_2$  adsorbed on (a)  $\text{Fe}_{\text{MT}}@/\text{MoSe}_2$ , (b)  $\text{Co}_{\text{MT}}@/\text{MoSe}_2$ , (c)  $\text{Ni}_{\text{MT}}@/\text{MoSe}_2$  (d)  $\text{Cu}_{\text{H}}@/\text{MoSe}_2$  and (e)  $\text{Cu}_{\text{MT}}@/\text{MoSe}_2$ . The dotted line denotes the Fermi level ( $E_f$ ), the red, green, and blue lines represent the 3d orbital of the metal atom, and the 2p orbital of the carbon or oxygen atom of  $\text{CO}_2$ , respectively.

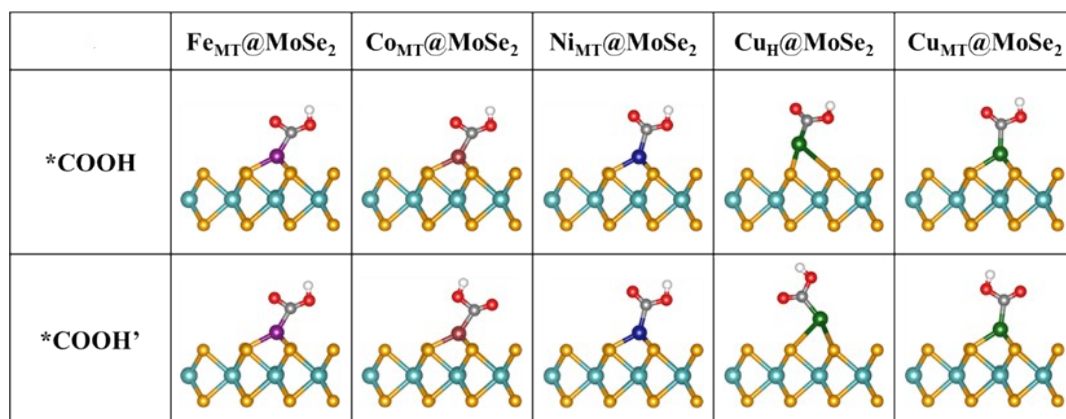

**Fig. S5** Optimized structure of  $^*\text{COOH}$  and  $^*\text{COOH}'$  (initial structures are  $^*\text{OCHO}$ ) intermediates formed on  $\text{TM}@\text{MoSe}_2$ . The orange, blue, purple, brown, dark blue, green, grey, red and white balls represent Se, Mo, Fe, Co, Ni, Cu, C, O and H atoms, respectively.

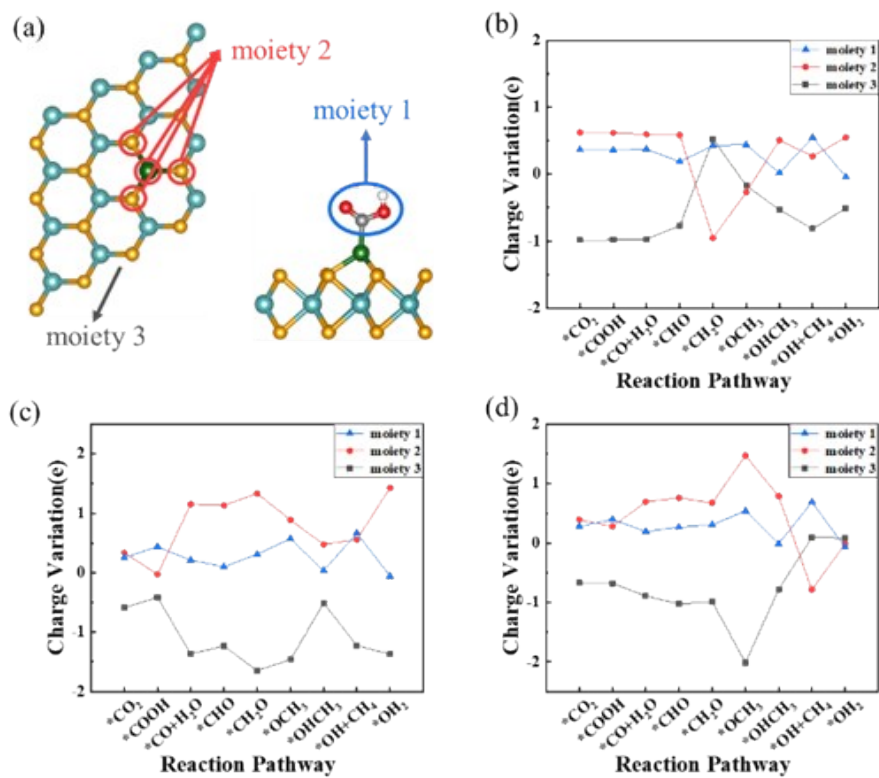

**Fig. S6** (a) Top and side views of three moieties of the catalyst with \*COOH intermediate. The orange, blue, green, grey, red and white balls represent Se, Mo, TM, C, O and H atoms, respectively. Charge variation of the three moieties along the reaction pathway on (b) Ni<sub>MT</sub>@MoSe<sub>2</sub>, (c) Cu<sub>H</sub>@MoSe<sub>2</sub> and (d) Cu<sub>MT</sub>@MoSe<sub>2</sub>.

**Table S1** Chemical potentials ( $\mu$ ) of gas-phase molecules obtained by summing up DFT electronic energy ( $E_{\text{DFT}}$ ), zero point energy (ZPE), enthalpic temperature correction ( $\int C_p dT$ ), and entropy contribution ( $-TS$ ). <sup>a</sup> Data from Lim et al<sup>1</sup>. <sup>b</sup> Data from Peterson et al<sup>2</sup>. <sup>c</sup> Data from the current study. All data are given in eV.

| Species                 | $E_{\text{DFT}}^c$ | ZPE <sup>a</sup> (ZPE <sup>b</sup> ) | $\int C_p dT^b$ | $-TS^b$ | $\mu(\text{eV})$ |
|-------------------------|--------------------|--------------------------------------|-----------------|---------|------------------|
| CH <sub>4</sub>         | -24.04             | 1.19(1.20)                           | 0.10            | -0.60   | -23.34           |
| CO <sub>2</sub>         | -22.95             | 0.28(0.31)                           | 0.10            | -0.65   | -23.19           |
| CO                      | -14.78             | 0.12(0.14)                           | 0.09            | -0.67   | -15.22           |
| CH <sub>3</sub> OH      | -30.22             | (-1.35)                              | 0.11            | -0.79   | -32.25           |
| H <sub>2</sub>          | -6.77              | 0.3(0.27)                            | 0.09            | -0.42   | -6.83            |
| H <sub>2</sub> O        | -14.22             | 0.60(0.58)                           | 0.10            | -0.65   | -14.19           |
| HCOOH                   | -29.89             | 0.86(0.9)                            | 0.11            | -1.02   | -29.90           |
| CH <sub>2</sub> O(HCHO) | -22.13             | (-0.7)                               | 0.10            | -0.66   | -23.39           |



**Table S2** The electronic energy ( $E_{\text{DFT}}$ ), zero point energy (ZPE), and entropy contribution ( $-\text{TS}$ ) of adsorbate-surface systems. All data are given in eV.

| Adsorbed species on<br>$\text{Ni}_{\text{MT}}@\text{MoSe}_2$ | $E_{\text{DFT}}$ | ZPE    | $-\text{TS}$ |
|--------------------------------------------------------------|------------------|--------|--------------|
| *COOH                                                        | -359.4365        | 0.5991 | -0.1966      |
| *CO                                                          | -349.7961        | 0.2013 | -0.1011      |
| *CHO                                                         | -352.0181        | 0.4336 | -0.1501      |
| *CH <sub>2</sub> O                                           | -355.7942        | 0.7099 | -0.1532      |
| *OCH <sub>3</sub>                                            | -359.6960        | 1.0581 | -0.1350      |
| *OHCH <sub>3</sub>                                           | -364.1471        | 1.4212 | -0.2671      |
| *OH                                                          | -343.4624        | 0.3227 | -0.0896      |
| *OH <sub>2</sub>                                             | -347.9677        | 0.6545 | -0.1935      |
| Adsorbed species on<br>$\text{Cu}_{\text{H}}@\text{MoSe}_2$  | $E_{\text{DFT}}$ | ZPE    | $-\text{TS}$ |
| *COOH                                                        | -357.6122        | 0.5941 | -0.1985      |
| *CO                                                          | -346.4739        | 0.1645 | -0.0981      |
| *CHO                                                         | -349.9011        | 0.4396 | -0.0948      |
| *CH <sub>2</sub> O                                           | -353.4115        | 0.7508 | -0.1459      |
| *OCH <sub>3</sub>                                            | -358.0506        | 1.0672 | -0.2015      |
| *OHCH <sub>3</sub>                                           | -361.5334        | 1.4113 | -0.2754      |
| *OH                                                          | -342.0096        | 0.3274 | -0.1601      |
| *OH <sub>2</sub>                                             | -345.3603        | 0.6349 | -0.2170      |
| Adsorbed species on<br>$\text{Cu}_{\text{MT}}@\text{MoSe}_2$ | $E_{\text{DFT}}$ | ZPE    | $-\text{TS}$ |
| *COOH                                                        | -357.8521        | 0.5973 | -0.1977      |
| *CO                                                          | -346.5988        | 0.1848 | -0.1191      |
| *CHO                                                         | -350.1327        | 0.4435 | -0.1519      |
| *CH <sub>2</sub> O                                           | -352.8111        | 0.7655 | -0.1713      |
| *OCH <sub>3</sub>                                            | -358.1605        | 1.0727 | -0.2328      |
| *OHCH <sub>3</sub>                                           | -361.5658        | 1.4151 | -0.2185      |
| *OH                                                          | -342.0514        | 0.3222 | -0.1044      |
| *OH <sub>2</sub>                                             | -345.3997        | 0.6470 | -0.1948      |

**Table S3** The total energy of TM@MoSe<sub>2</sub> catalysts, binding energy ( $E_b$ , in eV) of the single transition metal atom in TM@MoSe<sub>2</sub>. The data in parenthesis denote the cohesive energy of the transition metal in bulk.

| Catalyst                            | Energy (eV) | $E_b$ (eV) |
|-------------------------------------|-------------|------------|
| Fe <sub>H</sub> @MoSe <sub>2</sub>  | -333.24     | -3.71      |
| Fe <sub>ST</sub> @MoSe <sub>2</sub> | -331.74     | -2.21      |
| Fe <sub>MT</sub> @MoSe <sub>2</sub> | -333.64     | -4.11      |
| Co <sub>H</sub> @MoSe <sub>2</sub>  | -332.97     | -3.78      |
| Co <sub>ST</sub> @MoSe <sub>2</sub> | -331.58     | -2.39      |
| Co <sub>MT</sub> @MoSe <sub>2</sub> | -333.33     | -4.14      |
| Ni <sub>H</sub> @MoSe <sub>2</sub>  | -332.46     | -3.52      |
| Ni <sub>ST</sub> @MoSe <sub>2</sub> | -331.31     | -2.37      |
| Ni <sub>MT</sub> @MoSe <sub>2</sub> | -332.98     | -4.04      |
| Cu <sub>H</sub> @MoSe <sub>2</sub>  | -330.56     | -1.62      |
| Cu <sub>ST</sub> @MoSe <sub>2</sub> | -330.56     | -1.62      |
| Cu <sub>MT</sub> @MoSe <sub>2</sub> | -330.64     | -1.70      |

**Table S4** The adsorption energy of H and CO<sub>2</sub> on TM@MoSe<sub>2</sub>.

| Catalyst                            | $E_{ads}(H)$ | $E_{ads}(CO_2)$ |
|-------------------------------------|--------------|-----------------|
| Fe <sub>MT</sub> @MoSe <sub>2</sub> | -0.410       | -0.886          |
| Co <sub>MT</sub> @MoSe <sub>2</sub> | -0.090       | -0.780          |
| Ni <sub>MT</sub> @MoSe <sub>2</sub> | 0.409        | -0.405          |
| Cu <sub>H</sub> @MoSe <sub>2</sub>  | -0.308       | -0.026          |
| Cu <sub>MT</sub> @MoSe <sub>2</sub> | -0.589       | -0.062          |

**Table S5** The free energy change of the first protonation step of CO<sub>2</sub>RR and HER.

| Catalyst                            | $\Delta G(*COOH)$ | $\Delta G(*COOH')$ | $\Delta G(*H)$ |
|-------------------------------------|-------------------|--------------------|----------------|
| Fe <sub>MT</sub> @MoSe <sub>2</sub> | -0.021            | 0.007              | -0.170         |
| Co <sub>MT</sub> @MoSe <sub>2</sub> | 0.173             | 0.444              | 0.150          |
| Ni <sub>MT</sub> @MoSe <sub>2</sub> | 0.639             | 0.639              | 0.649          |
| Cu <sub>H</sub> @MoSe <sub>2</sub>  | -0.304            | -0.284             | -0.068         |
| Cu <sub>MT</sub> @MoSe <sub>2</sub> | -0.432            | -0.432             | -0.349         |

**Table S6** The adsorption energy of CO, CH<sub>2</sub>O, CH<sub>3</sub>OH and CH<sub>4</sub> on TM@MoSe<sub>2</sub>

| Species                               | Ni <sub>MT</sub> @MoSe <sub>2</sub> | Cu <sub>H</sub> @MoSe <sub>2</sub> | Cu <sub>MT</sub> @MoSe <sub>2</sub> |
|---------------------------------------|-------------------------------------|------------------------------------|-------------------------------------|
| E <sub>ads</sub> (CO)                 | -2.230                              | -1.454                             | -1.427                              |
| E <sub>ads</sub> (CH <sub>2</sub> O)  | -0.685                              | -0.720                             | -0.698                              |
| E <sub>ads</sub> (CH <sub>3</sub> OH) | -0.948                              | -0.752                             | -0.709                              |
| E <sub>ads</sub> (CH <sub>4</sub> )   | -0.200                              | -0.198                             | -0.156                              |

**Table S7** Equilibrium potentials of several possible CO<sub>2</sub>RR cathode reactions.

| Cathode Reaction                                                                          | U <sub>equilibrium</sub> vs RHE(V) |
|-------------------------------------------------------------------------------------------|------------------------------------|
| CO <sub>2</sub> +2H <sup>+</sup> +2e <sup>-</sup> →CO(g)+H <sub>2</sub> O                 | -0.11                              |
| CO <sub>2</sub> +2H <sup>+</sup> +2e <sup>-</sup> →HCOOH(l)                               | -0.25                              |
| CO <sub>2</sub> +4H <sup>+</sup> +4e <sup>-</sup> →HCHO(l)+H <sub>2</sub> O               | -0.07                              |
| CO <sub>2</sub> +6H <sup>+</sup> +6e <sup>-</sup> →CH <sub>3</sub> OH(l)+H <sub>2</sub> O | 0.02                               |
| CO <sub>2</sub> +8H <sup>+</sup> +8e <sup>-</sup> →CH <sub>4</sub> (g)+2H <sub>2</sub> O  | 0.17                               |

**Table S8** DFT-predicted limiting potentials (U<sub>L</sub>), overpotential (η) and potential determining steps (PDS) for the production of CH<sub>4</sub>.

| Catalyst                                                          | U <sub>L</sub> vs RHE(V) | η(V)                                         | PDS                        |
|-------------------------------------------------------------------|--------------------------|----------------------------------------------|----------------------------|
| Ru <sub>3</sub> (Hexaaminotriphenylene) <sub>2</sub> <sup>3</sup> | -0.71                    | 0.91(U <sub>equilibrium</sub> =0.20 V)       | *CO→*CHO                   |
| Graphene supported Ag SACs <sup>4</sup>                           | -0.56                    | 0.73(U <sub>equilibrium</sub> =0.17 V)       | *OH→*+H <sub>2</sub> O     |
| C <sub>2</sub> N-graphene supported Ti SACs <sup>5</sup>          | -0.50                    | 0.67(U <sub>equilibrium</sub> =0.17 V)       | *CO→*CHO                   |
| Boron nitride monolayer supported Mo SACs <sup>6</sup>            | -0.45                    | /                                            | *OH→*+H <sub>2</sub> O     |
| Cu(111) <sup>7</sup>                                              | -0.97                    | /                                            | *CO→*CHO                   |
| <b>Cu<sub>H</sub>@MoSe<sub>2</sub> (this work)</b>                | <b>-0.316</b>            | <b>0.486(U<sub>equilibrium</sub>=0.17 V)</b> | <b>*OH→*H<sub>2</sub>O</b> |

**Table S9** Bader charge of the three moieties (the division into three moieties is illustrated in Figs 5a) in Ni<sub>MT</sub>@MoSe<sub>2</sub>, Cu<sub>H</sub>@MoSe<sub>2</sub> and Cu<sub>MT</sub>@MoSe<sub>2</sub>.

| Adsorbed species on Ni <sub>MT</sub> @MoSe <sub>2</sub> | moiety 1 (C <sub>x</sub> H <sub>y</sub> O <sub>z</sub> ) | moiety 2 (TMSe <sub>3</sub> ) | moiety 3 |
|---------------------------------------------------------|----------------------------------------------------------|-------------------------------|----------|
| *CO <sub>2</sub>                                        | 0.366                                                    | 0.622                         | -0.988   |
| *COOH                                                   | 0.361                                                    | 0.619                         | -0.981   |
| *CO                                                     | 0.373                                                    | 0.597                         | -0.971   |
| *CHO                                                    | 0.187                                                    | 0.585                         | -0.772   |
| *CH <sub>2</sub> O                                      | 0.428                                                    | -0.955                        | 0.527    |
| *OCH <sub>3</sub>                                       | 0.441                                                    | -0.271                        | -0.17    |
| *OHCH <sub>3</sub>                                      | 0.019                                                    | 0.511                         | -0.53    |
| *OH                                                     | 0.551                                                    | 0.267                         | -0.818   |
| *OH <sub>2</sub>                                        | -0.041                                                   | 0.55                          | -0.508   |
| Adsorbed species on Cu <sub>H</sub> @MoSe <sub>2</sub>  | moiety 1 (C <sub>x</sub> H <sub>y</sub> O <sub>z</sub> ) | moiety 2 (TMSe <sub>3</sub> ) | moiety 3 |
| *CO <sub>2</sub>                                        | 0.255                                                    | 0.337                         | -0.591   |
| *COOH                                                   | 0.438                                                    | -0.026                        | -0.412   |
| *CO                                                     | 0.212                                                    | 1.153                         | -1.365   |
| *CHO                                                    | 0.101                                                    | 1.133                         | -1.234   |
| *CH <sub>2</sub> O                                      | 0.312                                                    | 1.335                         | -1.647   |
| *OCH <sub>3</sub>                                       | 0.572                                                    | 0.89                          | -1.462   |
| *OHCH <sub>3</sub>                                      | 0.036                                                    | 0.476                         | -0.512   |
| *OH                                                     | 0.666                                                    | 0.56                          | -1.226   |
| *OH <sub>2</sub>                                        | -0.057                                                   | 1.429                         | -1.372   |
| Adsorbed species on Cu <sub>MT</sub> @MoSe <sub>2</sub> | moiety 1 (C <sub>x</sub> H <sub>y</sub> O <sub>z</sub> ) | moiety 2 (TMSe <sub>3</sub> ) | moiety 3 |
| *CO <sub>2</sub>                                        | 0.28                                                     | 0.393                         | -0.673   |
| *COOH                                                   | 0.399                                                    | 0.279                         | -0.678   |
| *CO                                                     | 0.195                                                    | 0.693                         | -0.888   |
| *CHO                                                    | 0.268                                                    | 0.758                         | -1.026   |
| *CH <sub>2</sub> O                                      | 0.307                                                    | 0.677                         | -0.985   |
| *OCH <sub>3</sub>                                       | 0.542                                                    | 1.472                         | -2.014   |
| *OHCH <sub>3</sub>                                      | -0.01                                                    | 0.788                         | -0.778   |
| *OH                                                     | 0.69                                                     | -0.783                        | 0.093    |
| *OH <sub>2</sub>                                        | -0.068                                                   | -0.015                        | 0.083    |

## References

1. D. Lim, J. H. Jo, D. Y. Shin, J. Wilcox, H. C. Ham and S. W. Nam, *Nanoscale*, 2014, **6**, 5087-5092.
2. A. A. Peterson, F. Abildpedersen, F. Studt, J. Rossmeisl and J. K. Norskov, *Energy Environ. Sci.*, 2010, **3**, 1311-1315.
3. Y. Tian, Y. Wang, L. Yan, J. Zhao and Z. Su, *Appl. Surf. Sci.*, 2019, **467-468**, 98-103.
4. H. He and Y. Jagvaral, *Phys. Chem. Chem. Phys.*, 2017, **19**, 11436-11446.
5. X. Cui, W. An, X. Liu, H. Wang, Y. Men and J. Wang, *Nanoscale*, 2018, **10**, 15262-15272.
6. Q. Cui, G. Qin, W. Wang, L. Sun, A. Du and Q. Sun, *Beilstein J. Nanotechnol.*, 2019, **10**, 540-548.
7. D. Y. Shin, J. H. Jo, J.-Y. Lee and D.-H. Lim, *Comput. Theor. Chem.*, 2016, **1083**, 31-37.
